# Supplementary material for: Outpatient Antibiotic Prescriptions in France: Patients and Providers Characteristics and Impact of the COVID-19 Pandemic
Source: Antibiotics (Basel). 2022 May 11;11(5):643. doi: 10.3390/antibiotics11050643 (PMC9137595; doi:10.3390/antibiotics11050643)
Supplement: Supplementary file 1 [file antibiotics-11-00643-s001.zip › antibiotics-1697020-supplementary.pdf]

## ***Supplementary Materials***

### **Description of the database and variables**

#### ***Database***

The SNDS (*Système National des Données de Santé* – French national health data system) is a medical-administrative data warehouse covering all health insurance schemes and almost all of the French population. It is built from a prospective, individualised and exhaustive collection of all care services presented to reimbursement. Only the use of drugs by patients residing in healthcare facilities with an internal pharmacy does not appear in the SNDS. The data is recorded in the form of individual data with treatment dates of care and detailed coding of the drugs and services provided. Pseudonymised identifiers link the patients' individual information with all outpatient services (*Datamart de consommation inter-régimes* [DCIR]) as well as with data from the programme for the medicalisation of information systems (PMSI) during hospitalisation in public or private facilities (1). Similarly, the administrative information such as age, gender, specialty, type of practice, conventional status, etc. of the health professionals associated with each of the outpatient services presented to reimbursement is available in a repository.

#### ***Variables***

Long-term illnesses (LTI) are serious and/or chronic illnesses defined by a list of conditions established by decree and which entitle the insured to exemption from co-payment (100% reimbursement) for care related to these illnesses. A patient is classified as suffering from a long-term illness when he/she benefits from the exemption system for long-term illnesses, i.e. when at least one of his or her benefits is fully reimbursed as an exemption from co-payment for a long-term illness during the study period. Thus, the number of cumulative long-term conditions per patient is estimated and classified as follows: 0, 1 and  $\geq 2$ .

Complementary universal health insurance (CMUc): it is used as an indicator of precariousness since its allocation is based on individual resources. However, this indicator cannot be used after the age of 60 since the amount of the minimum old-age pension paid to persons with low resources exceeds the limit for receiving CMUc.

French deprivation index (Fdep): it is calculated at municipal district level and helps to establish the socio-economic background of recipients on the basis of several parameters (median household income, proportion of higher education graduates, employment and unemployment within the district). The municipal districts are then stratified into population quintiles according to the level of disadvantage of the population, ranging from the least disadvantaged quintile (Q1) to the most disadvantaged quintile (Q5).

Urban area: these are densely populated residential areas (1500 inhabitants/km<sup>2</sup> and  $\geq 50,000$  inhabitants) and of intermediate density (300 inhabitants/km<sup>2</sup> and  $\geq 5000$  inhabitants).

Rural area: these are less dense residential areas (300 inhabitants/km<sup>2</sup> and 5000 inhabitants) or of very low density (25 inhabitants/km<sup>2</sup> and 300 inhabitants).

Healthcare professional's (HCP) type of practice: this is the legal status under which the HCP works. HCPs are referred to as private or salaried when they carry out all activities under this status, regardless of the location (hospital, outpatient setting). When HCPs carry out both private and salaried work this is referred to as mixed practice.

Affiliation with state healthcare system: this determines the prices applied by HCPs. While sector 2 allows the HCP to freely set the price for their services, sector 1 does not allow nationally regulated fees to be exceeded.

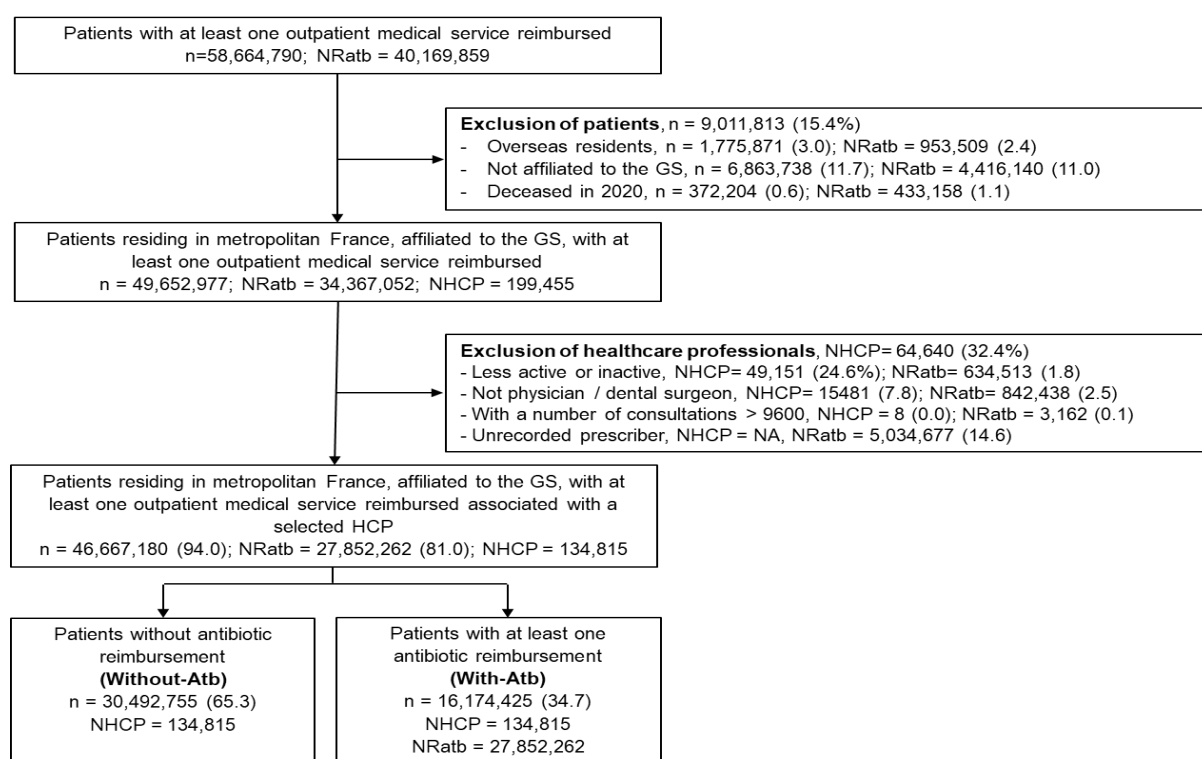

**Figure S1:** Flowchart of patient and prescriber selection from French health insurance databases (SNDS) - 2020.

**Key:**

n: Number of patients

NRatb: Number of reimbursements for antibiotics

NHCP: Number of healthcare professionals

HCP: Healthcare professional

GS: General scheme (main public health insurance scheme in France)

**Bibliography**

1. Tuppin P, Rudant J, Constantinou P, Gastaldi-Ménager C, Rachas A, de Roquefeuil L, et al. Value of a national administrative database to guide public decisions: From the système national d'information interrégimes de l'Assurance Maladie (SNIIRAM) to the système national des données de santé (SNDS) in France. *Rev Epidemiol Sante Publique*. 2017 Oct;65 Suppl 4:S149–67.

**Table S1:** Socio-demographic characteristics and distribution of prescriptions for children (<15 years old) with at least one antibiotic prescription reimbursement (With-Atb), 2019 and 2020, SNDS.

|                                                        |                                          | <b>With-Atb 2019</b><br><b>N = 3,501,798 (41.2)</b> | <b>With-Atb 2020</b><br><b>N= 2,624,533 (31.2)</b> | <b>Delta 2019-2020</b><br><b>N= 877,265 (25.1)</b> |
|--------------------------------------------------------|------------------------------------------|-----------------------------------------------------|----------------------------------------------------|----------------------------------------------------|
| <b>Socio-demographic characteristics</b>               |                                          |                                                     |                                                    |                                                    |
| <b>Sex, n (%)</b>                                      |                                          |                                                     |                                                    |                                                    |
|                                                        | Boy                                      | 1,787,349 (51.0)                                    | 1,341,525 (51.1)                                   | 445,824 (24.9)                                     |
|                                                        | Girl                                     | 1,714,449 (49.0)                                    | 1,283,008 (48.9)                                   | 431,441 (25.2)                                     |
| <b>Age, in years, n (%)</b>                            |                                          |                                                     |                                                    |                                                    |
|                                                        | [0 - 5[                                  | 1,528,973 (43.7)                                    | 1,133,255 (43.2)                                   | 395,718 (25.9)                                     |
|                                                        | [5 - 15[                                 | 1,972,825 (56.3)                                    | 1,491,278 (56.8)                                   | 481,547 (24.4)                                     |
| <b>Comorbidities, n (%)</b>                            |                                          |                                                     |                                                    |                                                    |
|                                                        | Chronic respiratory                      | 253,410 (7.8)                                       | 197,970 (8.1)                                      | 55,440 (21.9)                                      |
| <b>CMU-c <sup>1</sup></b>                              |                                          |                                                     |                                                    |                                                    |
|                                                        | Yes, n (%)                               | 636,450 (18.2)                                      | 550,485 (21.0)                                     | 85,965 (13.5)                                      |
| <b>Use of care</b>                                     |                                          |                                                     |                                                    |                                                    |
| <b>Number of consultations, n (%)</b>                  |                                          |                                                     |                                                    |                                                    |
|                                                        | [1 - 2[                                  | 525,860 (15.0)                                      | 717,778 (27.4)                                     | -191,918 (36.5)                                    |
|                                                        | [3 - 4[                                  | 861,249 (24.6)                                      | 795,436 (30.3)                                     | 65,813 (7.6)                                       |
|                                                        | [5 - 9[                                  | 1,444,141 (41.2)                                    | 864,821 (33.0)                                     | 579,320 (40.1)                                     |
|                                                        | [10 and +[                               | 670,548 (19.2)                                      | 246,498 (9.4)                                      | 424,050 (63.2)                                     |
| <b>Prescription per recipient, n (%)</b>               |                                          |                                                     |                                                    |                                                    |
|                                                        | 1                                        | 1,996,763 (57.0)                                    | 1,729,601 (65.9)                                   | 267,162 (13.4)                                     |
|                                                        | 2                                        | 802,948 (22.9)                                      | 551,662 (21.0)                                     | 251,286 (31.3)                                     |
|                                                        | 3                                        | 355,591 (10.2)                                      | 197,946 (7.5)                                      | 157,645 (44.3)                                     |
|                                                        | 4 or more                                | 346,496 (9.9)                                       | 145,324 (5.5)                                      | 201,172 (58.1)                                     |
| <b>Antibiotic prescription</b>                         |                                          | <b>6,446,682</b>                                    | <b>4,141,785</b>                                   | <b>↓ 2,304,901 (35.8)</b>                          |
| <b>Therapeutic group</b>                               |                                          |                                                     |                                                    |                                                    |
| <b>J01A Tetracyclines</b>                              |                                          | 59,521 (0.9)                                        | 59,269 (1.4)                                       | 252 (0.4)                                          |
| <b>J01C Penicillins</b>                                |                                          | 4,669,504 (72.4)                                    | 2,976,075 (71.9)                                   | 1,693,429 (36.3)                                   |
|                                                        | J01CA Penicillins with extended spectrum | 3,875,950 (60.1)                                    | 2,423,606 (58.5)                                   | 1,452,344 (37.5)                                   |
|                                                        | J01CR Combinations of penicillins        | 782,662 (12.1)                                      | 544,766 (13.2)                                     | 237,896 (30.4)                                     |
| <b>J01D Other beta-lactams</b>                         |                                          | 1,046,980 (16.2)                                    | 640,281 (15.5)                                     | 406,699 (38.8)                                     |
|                                                        | J01DD 3G cephalosporins                  | 973,377 (15.1)                                      | 601,339 (14.5)                                     | 372,038 (38.2)                                     |
| <b>J01E Sulphonamides and trimethoprim</b>             |                                          | 57,874 (0.9)                                        | 43,689 (1.1)                                       | 14,185 (24.5)                                      |
| <b>J01F Macrolides</b>                                 |                                          | 548,106 (8.5)                                       | 370,554 (9.0)                                      | 177,552 (32.4)                                     |
|                                                        | J01FA10: Azithromycin                    | 161,335 (2.5)                                       | 137,015 (3.3)                                      | 24,320 (15.1)                                      |
| <b>J01M Quinolones</b>                                 |                                          | 3,270 (0.1)                                         | 2,862 (0.1)                                        | 408 (12.5)                                         |
| <b>J01R Combinations of antibacterials<sup>1</sup></b> |                                          | 21,712 (0.3)                                        | 17,546 (0.4)                                       | 4,166 (19.2)                                       |
| <b>J01X Other antibacterials</b>                       |                                          | 39,469 (0.6)                                        | 31,335 (0.8)                                       | 8,134 (20.6)                                       |

<sup>1</sup>Complementary universal health insurance (CMUc)

**Table S2:** Distribution of therapeutic classes of antibiotics dispensed according to the prescriber's subspecialty, 2019, SNDS.

|                                                        | <b>GPs<sup>1</sup></b><br>N= 26,566,106 (78.0) | <b>Dental surgeons</b><br>N=4,164,192 (12.2) | <b>Paediatricians</b><br>N= 742,006 (2.2) | <b>Dermatologists</b><br>N= 563,016 (1.7) | <b>Other subspecialties</b><br>N= 2,012,017 (5.9) |
|--------------------------------------------------------|------------------------------------------------|----------------------------------------------|-------------------------------------------|-------------------------------------------|---------------------------------------------------|
|                                                        | <b>n (%)</b>                                   | <b>n (%)</b>                                 | <b>n (%)</b>                              | <b>n (%)</b>                              | <b>n (%)</b>                                      |
| <b>J01A Tetracyclines</b>                              | 594,014 (2.2)                                  | 4,079 (0.1)                                  | 216 (0.3)                                 | 466,558 (82.9)                            | 65,232 (3.2)                                      |
| <b>J01C Penicillins</b>                                | 13,828,490 (52.0)                              | 2,791,142 (67.0)                             | 568,656 (76.6)                            | 37,705 (6.7)                              | 775,348 (38.5)                                    |
| J01CA Penicillins with extended spectrum               | 10,290,861 (38.7)                              | 2,331,766 (56.0)                             | 454,836 (61.3)                            | 14,029 (2.5)                              | 38,382 (19.1)                                     |
| J01CR Combinations of penicillins                      | 3,340,219 (12.6)                               | 458,944 (11.0)                               | 112,667 (15.2)                            | 17,310 (3.1)                              | 377,818 (18.8)                                    |
| <b>J01D Other beta-lactams</b>                         | 3,169,494 (11.9)                               | 7,368 (0.2)                                  | 83,940 (11.3)                             | 2,160 (0.4)                               | 162,645 (8.1)                                     |
| J01DC 2G cephalosporins                                | 477,753 (1.8)                                  | 1,354 (0.0)                                  | 4,112 (0.6)                               | 348 (0.1)                                 | 24,299 (1.2)                                      |
| J01DD 3G cephalosporins                                | 2,679,665 (10.1)                               | 5,814 (0.1)                                  | 79,769 (10.8)                             | 1,707 (0.3)                               | 137,271 (6.8)                                     |
| <b>J01E Sulphonamides and trimethoprim</b>             | 317,182 (1.2)                                  | 871 (0.0)                                    | 8,548 (1.1)                               | 1,119 (0.2)                               | 48,065 (2.4)                                      |
| <b>J01F Macrolides</b>                                 | 4,406,077 (16.6)                               | 28,8341 (6.9)                                | 70,542 (9.5)                              | 39,718 (7.1)                              | 305,496 (15.2)                                    |
| <b>J01M Quinolones</b>                                 | 1,282,310 (4.8)                                | 4,117 (0.1)                                  | 997 (0.1)                                 | 2,302 (0.4)                               | 218,343 (10.5)                                    |
| <b>J01R Combinations of antibacterials<sup>2</sup></b> | 653,691 (2.4)                                  | 1,061,386 (25.5)                             | 3,565 (0.5)                               | 3,220 (0.5)                               | 213,283 (10.6)                                    |
| <b>J01X Combinations, antibacterials</b>               | 2,314,018 (8.77)                               | 5,403 (0.1)                                  | 3,546 (0.4)                               | 10,018 (1.8)                              | 217,709 (10.8)                                    |

<sup>1</sup> General practitioners; <sup>2</sup> Spiramycin and metronidazole

**Table S3:** Distribution of therapeutic classes of antibiotics dispensed according to the prescriber's subspecialty, 2020, SNDS.

|                                                        | <b>GPs<sup>1</sup></b><br>N= 20,786,542 (74.6) | <b>Dental surgeons</b><br>N= 4,208,530 (15.1) | <b>Paediatricians</b><br>N= 486,840 (1.8) | <b>Dermatologists</b><br>N= 560,958 (2.0) | <b>Other specialisms</b><br>N= 1,809,392 (6.5) |
|--------------------------------------------------------|------------------------------------------------|-----------------------------------------------|-------------------------------------------|-------------------------------------------|------------------------------------------------|
|                                                        | <b>n (%)</b>                                   | <b>n (%)</b>                                  | <b>n (%)</b>                              | <b>n (%)</b>                              | <b>n (%)</b>                                   |
| <b>J01A Tetracyclines</b>                              | 592,645 (2.9)                                  | 3,683 (0.1)                                   | 2,330 (0.5)                               | 465,843 (83.0)                            | 62,237 (3.4)                                   |
| <b>J01C Penicillins</b>                                | 9,828,988 (47.3)                               | 2,918,249 (69.3)                              | 361,105 (74.2)                            | 36,177 (6.5)                              | 676,107 (37.4)                                 |
| J01CA Penicillins with extended spectrum               | 6,863,715 (33.0)                               | 2,421,536 (57.5)                              | 284,013 (58.3)                            | 12,013 (2.1)                              | 315,946 (17.5)                                 |
| J01CR Combinations of penicillins                      | 2,793,342 (13.4)                               | 496,351 (11.8)                                | 76,285 (15.7)                             | 18,581 (3.3)                              | 347,025 (19.2)                                 |
| <b>J01D Other beta-lactams</b>                         | 2,188,488 (10.5)                               | 5,745 (0.1)                                   | 54,775 (11.3)                             | 1,624 (0.3)                               | 127,300 (7.0)                                  |
| J01DC 2G cephalosporins                                | 252,495 (1.2)                                  | 929 (0.0)                                     | 2,361 (0.5)                               | 202 (0.0)                                 | 16,023 (0.9)                                   |
| J01DD 3G cephalosporins                                | 1,929,430 (9.3)                                | 4,656 (0.1)                                   | 52,382 (10.8)                             | 1,293 (0.2)                               | 110,247 (6.1)                                  |
| <b>J01E Sulphonamides and trimethoprim</b>             | 327,469 (1.6)                                  | 799 (0.0)                                     | 6,873 (1.4)                               | 1,209 (0.2)                               | 51,311 (2.8)                                   |
| <b>J01F Macrolides</b>                                 | 3,691,466 (17.8)                               | 289,773 (6.9)                                 | 54,201 (11.1)                             | 42,164 (7.5)                              | 294,147 (16.3)                                 |
| <b>J01M Quinolones</b>                                 | 1,136,150 (5.5)                                | 3,447 (0.1)                                   | 990 (0.2)                                 | 1,961 (0.4)                               | 197,268 (10.9)                                 |
| <b>J01R Combinations of antibacterials<sup>2</sup></b> | 733,900 (3.5)                                  | 980,070 (23.3)                                | 3,018 (0.7)                               | 2,874 (0.5)                               | 189,026 (10.4)                                 |
| <b>J01X Other antibacterials</b>                       | 2,280,084 (11.0)                               | 5,358 (0.1)                                   | 3,259 (0.7)                               | 8,904 (1.6)                               | 208,182 (11.5)                                 |

<sup>1</sup> General practitioners; <sup>2</sup> Spiramycin and metronidazole

**Table S4:** Socio-demographic characteristics of antibiotic prescribers, overall and according to subspecialty, 2020, SNDS.

|                                     | All HCPs <sup>1</sup> |          | GPs <sup>2</sup> |             | Dentists      |             | Paediatricians |            | Dermatologists |            | Other         |             |
|-------------------------------------|-----------------------|----------|------------------|-------------|---------------|-------------|----------------|------------|----------------|------------|---------------|-------------|
|                                     | n                     | %        | n                | %           | n             | %           | n              | %          | n              | %          | n             | %           |
| <b>Sex</b>                          |                       |          |                  |             |               |             |                |            |                |            |               |             |
| Women                               | 55,190                | 41.1     | 23,867           | 41.9        | 15,664        | 43.9        | 1,770          | 67.5       | 1,892          | 69.6       | 11,997        | 33.2        |
| Men                                 | 79,001                | 58.9     | 33,152           | 58.1        | 20,061        | 56.2        | 851            | 32.5       | 826            | 30.4       | 24,111        | 66.8        |
| <b>Age, in years</b>                |                       |          |                  |             |               |             |                |            |                |            |               |             |
| < 50                                | 54,583                | 40.9     | 22,000           | 38.9        | 16,671        | 46.4        | 963            | 37.5       | 675            | 25.2       | 11,700        | 32.8        |
| ≥ 50                                | 78,866                | 59.1     | 34,607           | 61.1        | 19,245        | 53.6        | 1,606          | 62.5       | 2,004          | 74.8       | 23,978        | 67.2        |
| Mean ± SD <sup>3</sup>              | 51.6 ± 12.5           | -        | 52.3 ± 12.2      | -           | 47.0 ± 13.2   | -           | 53.5 ± 11.6    | -          | 56.1 ± 10.8    | -          | 54.4 ± 11.2   | -           |
| <b>Years of experience</b>          |                       |          |                  |             |               |             |                |            |                |            |               |             |
| Junior ≤15 years                    | 54,034                | 40.9     | 22,333           | 40.0        | 14,744        | 41.9        | 1,292          | 50.7       | 754            | 28.4       | 14,911        | 41.7        |
| Intermediate 15-30 years            | 45,801                | 34.7     | 19,457           | 34.8        | 11,782        | 33.4        | 733            | 28.8       | 1,048          | 39.4       | 12,781        | 35.8        |
| Senior ≥ 30 years                   | 32,210                | 24.4     | 14,065           | 25.2        | 8,705         | 24.7        | 524            | 20.6       | 858            | 32.3       | 8,058         | 22.5        |
| Mean ± SD                           | 19.0 ± 12.6           | -        | 19.3 ± 12.9      | -           | 18.9 ± 12.7   | -           | 16.6 ± 12.8    | -          | 22.4 ± 11.9    | -          | 18.6 ± 12.2   | -           |
| <b>Type of practice</b>             |                       |          |                  |             |               |             |                |            |                |            |               |             |
| Private                             | 126,018               | 93.5     | 54,144           | 94.8        | 34,783        | 96.4        | 2,255          | 85.8       | 2,422          | 88.8       | 32,414        | 89.4        |
| Mixed                               | 8,675                 | 6.4      | 2,871            | 5.0         | 1,293         | 3.6         | 373            | 14.2       | 307            | 11.2       | 3,831         | 10.6        |
| Salaried                            | 122                   | 0.1      | 119              | 0.2         | 1             | 0.0         | 0              | 0.0        | 0              | 0.0        | 2             | 0.0         |
| <b>Conventional status</b>          |                       |          |                  |             |               |             |                |            |                |            |               |             |
| Sector 1                            | 108,663               | 81.1     | 53,258           | 94.0        | 35,980        | 100.0       | 1,430          | 54.5       | 1,498          | 55.4       | 16,497        | 45.7        |
| Sector 2                            | 25,381                | 18.9     | 3,377            | 6.0         | 0             | 0.0         | 1,192          | 45.5       | 1,206          | 44.6       | 19,606        | 54.3        |
| <b>Activity</b>                     |                       |          |                  |             |               |             |                |            |                |            |               |             |
| Consultations                       | 229,491,992           | -        | 178,368,176      | 77.7        | 8,727,061     | 3.8         | 5,143,727      | 2.2        | 3,905,140      | 1.7        | 33,347,888    | 14.5        |
| Patients seen                       | 96,726,501            | -        | 64,789,877       | 67.0        | 7,993,011     | 8.3         | 2,237,076      | 2.3        | 3,090,882      | 3.2        | 18,615,655    | 19.4        |
| Prescriptions <sup>4</sup>          | 27,852,262            | -        | 20,786,542       | 74.6        | 4,208,530     | 15.1        | 486,840        | 1.7        | 560,958        | 2.0        | 1,809,392     | 6.5         |
| Prescription per 1000 consultations | 121                   | -        | 117              | -           | -             | -           | 95             | -          | 144            | -          | 54            | -           |
| <b>All Providers</b>                | <b>134,815</b>        | <b>-</b> | <b>57,134</b>    | <b>42.4</b> | <b>36,077</b> | <b>26.8</b> | <b>2,628</b>   | <b>2.0</b> | <b>2,729</b>   | <b>2.0</b> | <b>36,247</b> | <b>26.9</b> |

<sup>1</sup> healthcare professionals; <sup>2</sup> General practitioners; <sup>3</sup> Standard Deviation; <sup>4</sup>Antibiotic prescription
